# Supplementary material for: Fabrication of a paper-based sensor from graphene quantum dots coated with a polymeric membrane for the determination of gold(iii) ions
Source: Royal Society of Chemistry journal article supplement (doi:10.1039/d1ay01258d), 2021-01-01
Supplement: d1ay01258d1.pdf [file d1ay01258d1.pdf]

## Supplementary Information

### Fabrication of paper-based sensor from graphene quantum dots coated with polymeric membrane for determination of gold(III) ion

Suphakan Thanomsak<sup>a</sup>, Chanunporn Insombat<sup>a</sup>, Phutita Chaiyo<sup>a</sup>,

Thawatchai Tuntulani<sup>b</sup>, Wanwisa Janrungroatsakul<sup>a,\*</sup>

<sup>a</sup> Department of Chemistry, Faculty of Science, Naresuan University, Phitsanulok 65000, Thailand

<sup>b</sup> Department of Chemistry, Faculty of Science, Chulalongkorn University, Bangkok 10330, Thailand

#### Contents:

**Fig. S1** (a) ATR-FT-IR spectrum and (b) Raman spectrum of as-prepared GQDs.

**Fig. S2** UV-vis spectra of the reaction mixture after addition of various concentrations of Au<sup>3+</sup> to (a) GQDs (50 mg mL<sup>-1</sup>), (b) glucose (50 mg mL<sup>-1</sup>) and (c) the mixture solution of GQDs (50 mg mL<sup>-1</sup>) and glucose (50 mg mL<sup>-1</sup>).

**Fig. S3** Effect of the GQDs concentration from 10 to 100 mg mL<sup>-1</sup> in the absence and presence of 0.6 mM Au<sup>3+</sup>.

**Fig. S4** (a) Effect of the adsorption time of GQDs, (b) effect of the coating time of polymeric membrane and (c) effect of the incubation time after immersing in 0.6 mM Au<sup>3+</sup>.

**Fig. S5** (a)  $\Delta E$  responses and (b) photographical images of paper-based sensor after immersion in 0.6 mM of different anions.

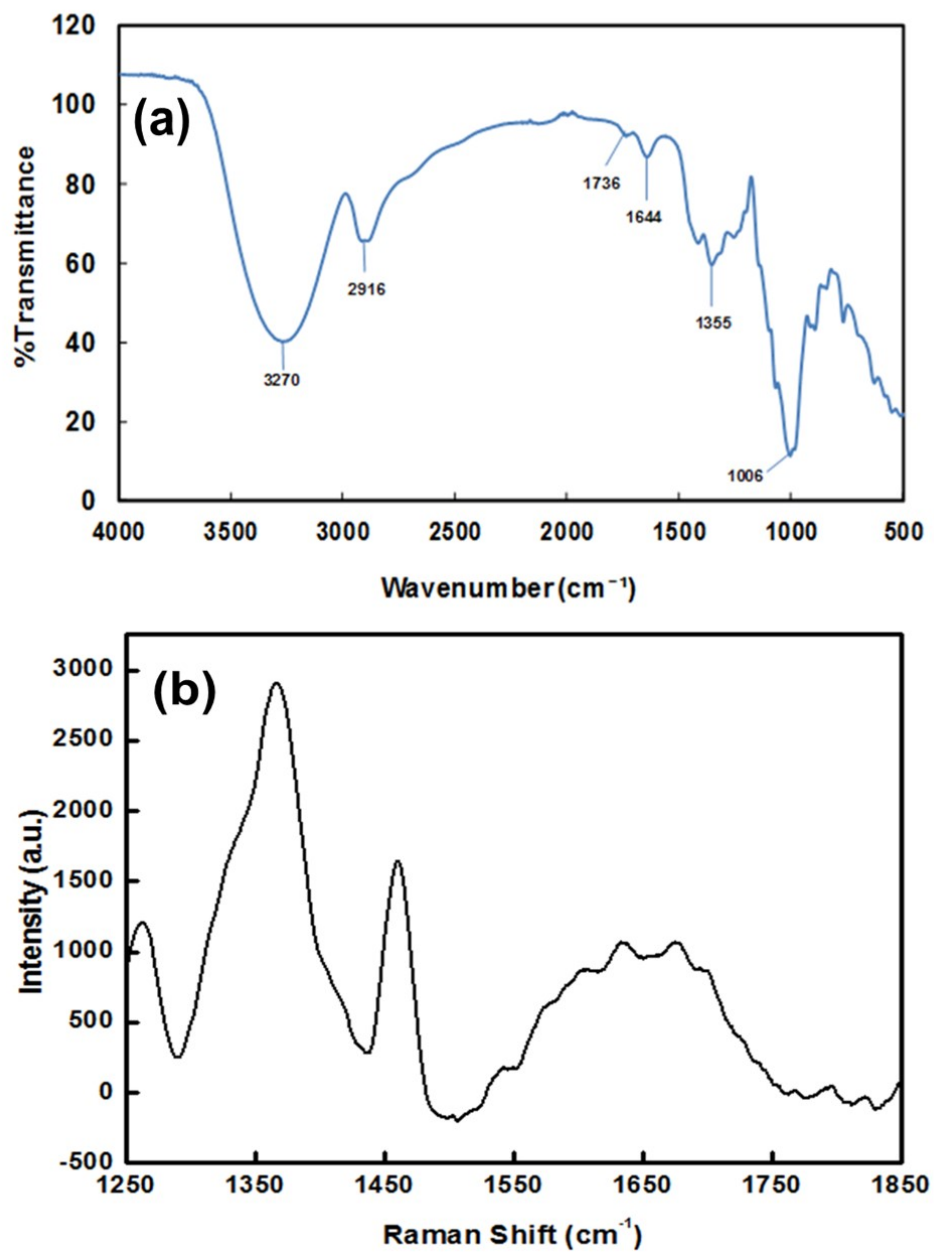

Fig. S1 (a) ATR-FT-IR spectrum and (b) Raman spectrum of as-prepared GQDs.

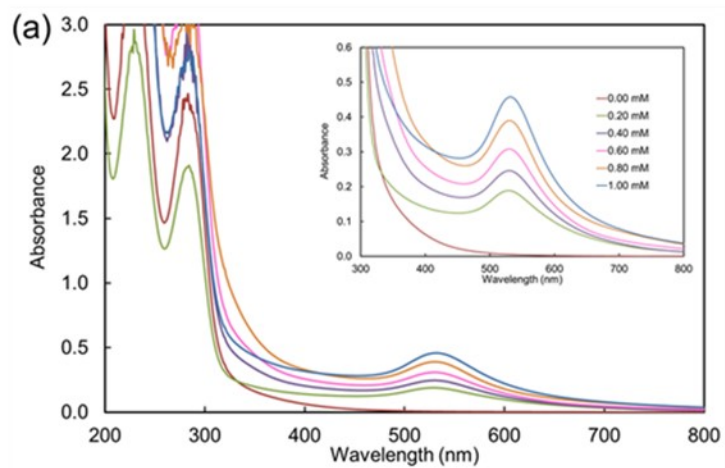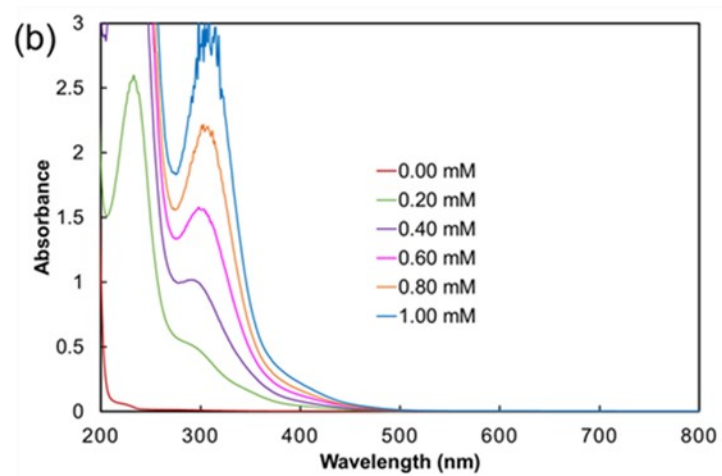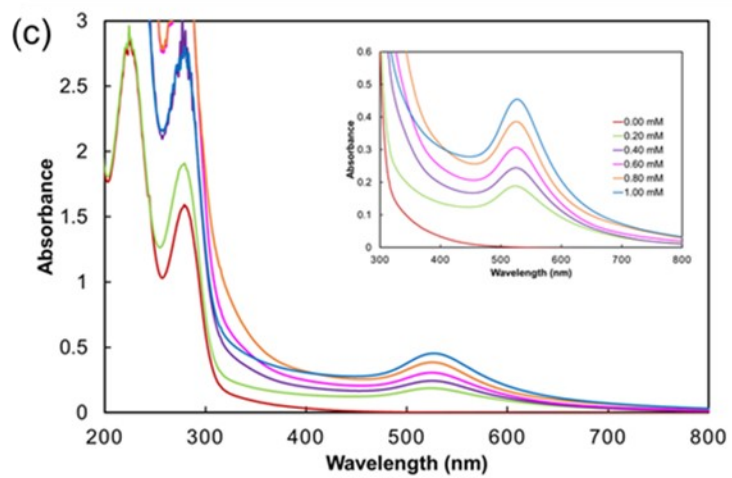

**Fig. S2** UV-vis spectra of the reaction mixture after addition of various concentrations of  $\text{Au}^{3+}$  to (a) GQDs ( $50 \text{ mg mL}^{-1}$ ), (b) glucose ( $50 \text{ mg mL}^{-1}$ ) and (c) the mixture solution of GQDs ( $50 \text{ mg mL}^{-1}$ ) and glucose ( $50 \text{ mg mL}^{-1}$ ).

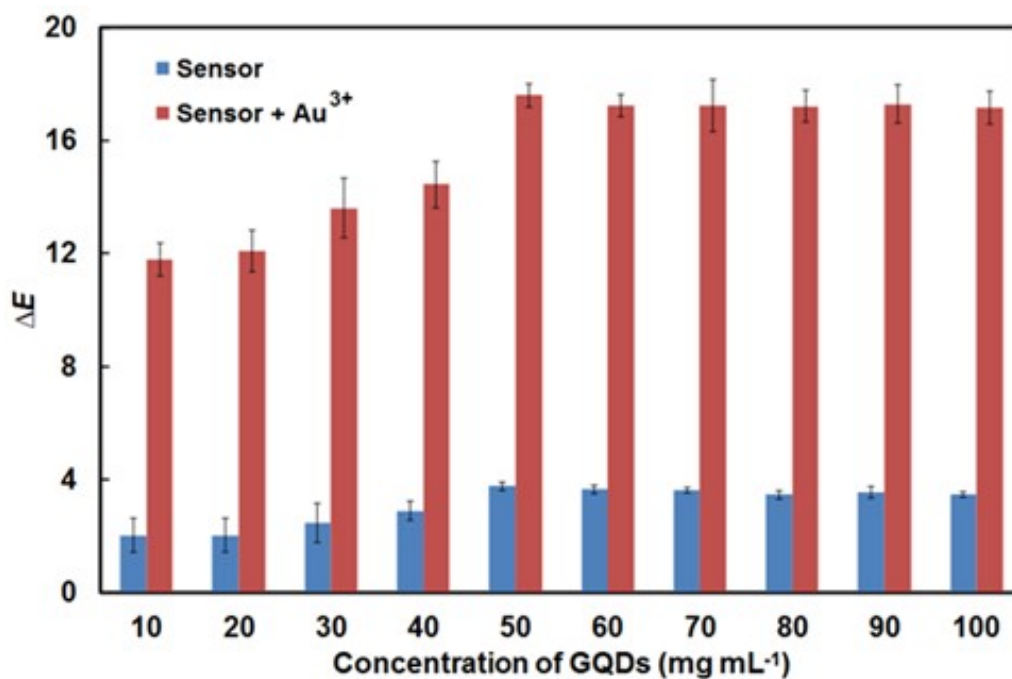

**Fig. S3** Effect of the GQDs concentration from 10 to  $100 \text{ mg mL}^{-1}$  in the absence and presence of  $0.6 \text{ mM Au}^{3+}$ .

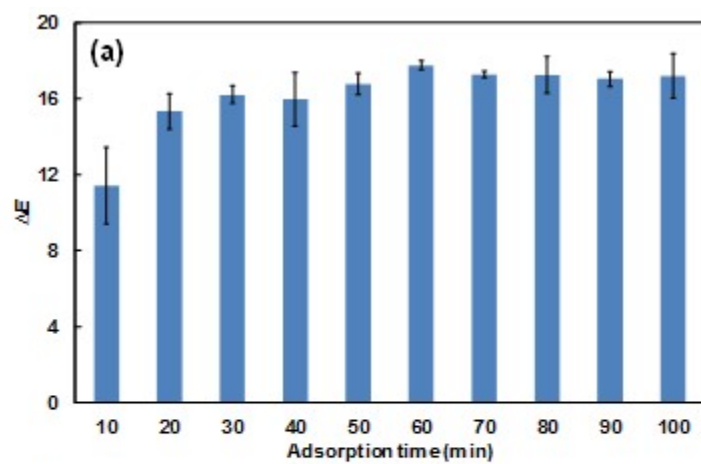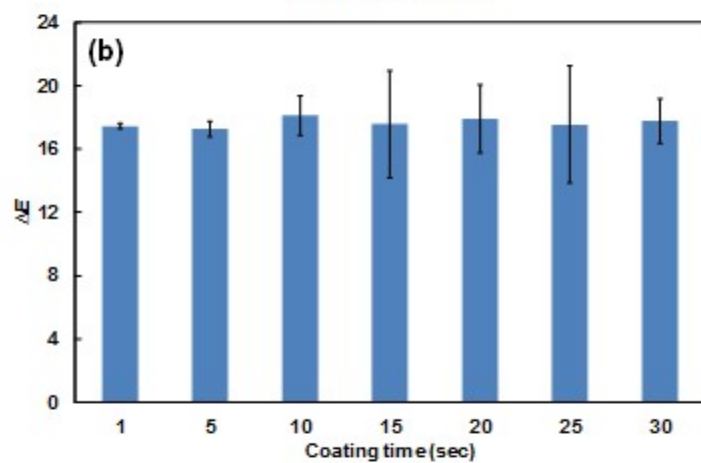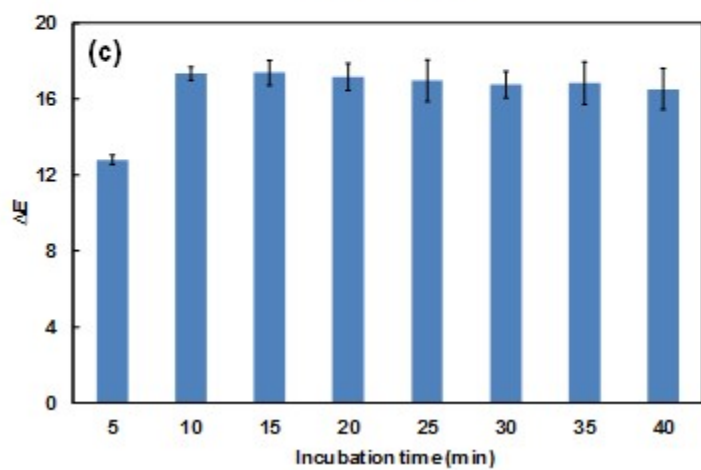

**Fig. S4** (a) Effect of the adsorption time of GQDs, (b) effect of the coating time of polymeric membrane and (c) effect of the incubation time after immersing in 0.6 mM  $\text{Au}^{3+}$ .

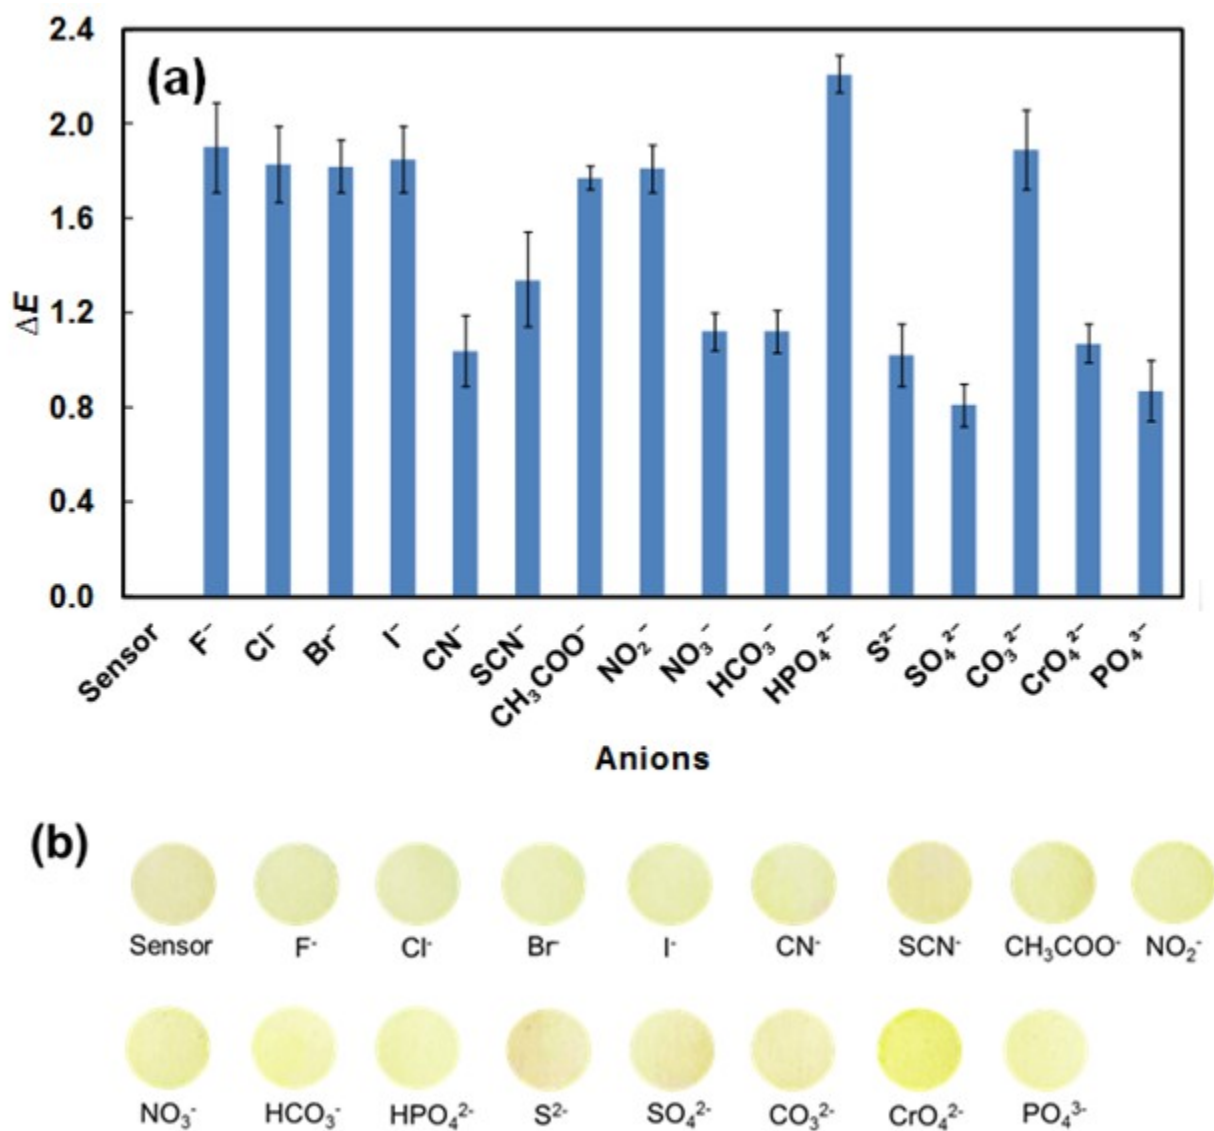

**Fig. S5** (a)  $\Delta E$  responses and (b) photographical images of paper-based sensor after immersion in 0.6 mM of different anions.
